# Supplementary material for: Light Emitting Diodes Irradiation Regulates miRNA-877-3p to Promote Cardiomyocyte Proliferation
Source: PubMed Central journal article supplement (PMC9346386; doi:10.7150/ijms.70743), 2022-07-11
Supplement: ijmsv19p1254s1.pdf [file ijmsv19p1254s1.pdf]

Supplementary Figure 1. Sequences of miR-877-3p binding sites to NSUN2, YTHDF2 and MTUS1.

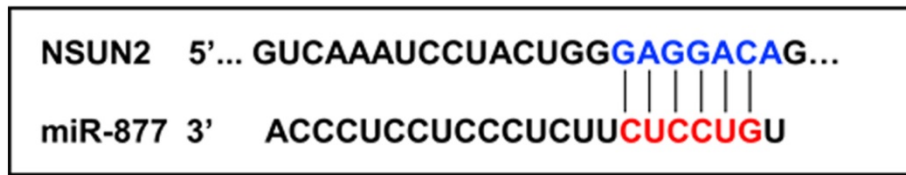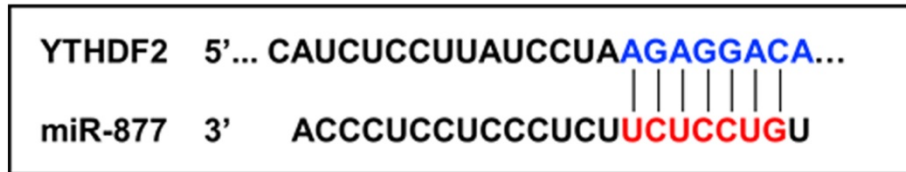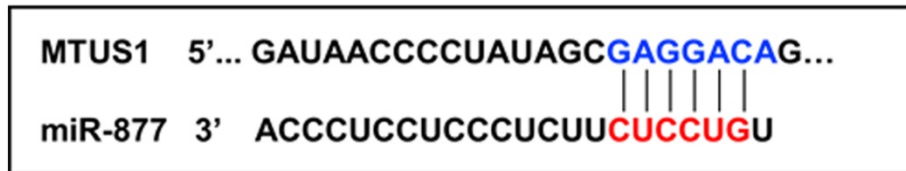

**Table S1.**

| <i>GENE</i>                     | <i>Forward primer</i>         | <i>Reverse primer</i>       |
|---------------------------------|-------------------------------|-----------------------------|
| <i>miR-590-3p</i>               | GGCCTAATTTTATGTATAAGCTA<br>GT | ATCCAGTGCAGGGTCCGAGG        |
| <i>miR-15b-3p</i>               | CGAATCATTATTTGCTGCTCTA        | ATCCAGTGCAGGGTCCGAGG        |
| <i>miR-19b-3p</i>               | TGTGCAAATCCATGCAAACTG<br>A    | ATCCAGTGCAGGGTCCGAGG        |
| <i>miR-143-3p</i>               | CCGCCCTGAGATGAAGCACTG         | ATCCAGTGCAGGGTCCGAGG        |
| <i>miR-877-3p</i>               | TGTCCTCTTCTCCCTC              | TGTCGTGGAGTCGGC             |
| <i>miR-877-3p<br/>mimics</i>    | UGUCCUCUUCUCCCUCCUCC<br>A     | GGAGGAGGGAGAAGAGGAC<br>A    |
| <i>miR-877-3p<br/>inhibitor</i> | UGGGAGGAGGGAGAAGAGGAC<br>A    |                             |
| <i>Gadd45g<br/>siRNA</i>        | CCGCCAAAGUCCUGAAUGUTT         | ACAUUCAGGACUUUGGCGG<br>TT   |
| <i>U6</i>                       | GCTTCGGCAGCACATATACTAA<br>AAT | CGCTTCACGAATTTGCGTGT<br>CAT |
| <i>18s</i>                      | CATTCGAACGTCTGCCCTATC         | CCTGCTGCCTTCCTTGGA          |
